# Supplementary material for: Neurovascular anatomy of dwarf dinosaur implies precociality in sauropods
Source: eLife. 2022 Dec 20;11:e82190. doi: 10.7554/eLife.82190 (PMC9767461; doi:10.7554/eLife.82190)
Supplement: Supplementary file 1. [file elife-82190-supp1.xlsx]

## Sheet: Tabelle2
Individual scan details and measurements
	specimens (DFMMh/FV)	voltage (kV)	X-ray tube current (μA)	exposure time (in s)	voxel size	scanning institution	element	prootic, dorsoventral height (without articulation surface) in mm	prootic, anteroposterior length (without articulation surface) in mm	prootic, anteroposterior constriction between V and VII openings (on dorsoventral mid-height of these foramina) in mm	otoccipital, min. mediolateral width between foramen magnum and posterior border of vagal foramen in mm	otoccipital, max. dorsoventral height of foramen magnum portion in mm	otoccipital, min. dorsoventral height; proximal to distal widening, in mm	anteroposterior length of endosseous labyrinth between anterior-most ASC border and posteriormost PSC border
	581.1, 2 & 3	220	343	1	0.04879 mm	Zeiss	nearly complete articulated braincase	55,5 (the prootic of this specimen preserves parts that are missing in the other specimens, which explains the height difference)	28.5	15	10.5	19	18	right: 15,8
	1077	90	88	3	43.7862 um	University of Greifswald	left fragmentary articulated braincase	37	30	15	15	16	19	left: 16,5
	466+205	60	133	4	44.9999 um	University of Greifswald	right prootic + otoccipital	40	23	12 (ridge on CN VII opening is artificially reconstructed on the fossil)	9	16	10	right: 15,2
	466	60	133	2.5	44.1346 um	University of Greifswald	right prootic
	205	60	133	2.5	36.3461 um	University of Greifswald	right otoccipital
	964	60	133	2	43.2000 um	University of Greifswald	left prootic	37	28	14
	561	60	133	3	43.3928 um	University of Greifswald	left prootic	37	29	14
	981.2	60	133	3	22.5000 um (42.500 was mistakenly used for segmentation, which was considered in all other measurements)	University of Greifswald	right otoccipital				8	10	8
	898	60	133	1.5	25.3125 um	University of Greifswald	right otoccipital				6	7	7
	249	60	133	2	25.9616 um	University of Greifswald	right otoccipital				8	9	7
